# Supplementary material
Source: PubMed Central journal article supplement (PMC7337276)
Supplement: NIHMS1544845-supplement-2.pdf [file NIHMS1544845-supplement-2.pdf]

# 2011

|                        | OD                    | OS                    |
|------------------------|-----------------------|-----------------------|
| Average RNFL Thickness | 64 $\mu$ m            | 67 $\mu$ m            |
| RNFL Symmetry          | 52%                   |                       |
| Rim Area               | 0.60 mm <sup>2</sup>  | 0.68 mm <sup>2</sup>  |
| Disc Area              | 1.79 mm <sup>2</sup>  | 1.39 mm <sup>2</sup>  |
| Average C/D Ratio      | 0.83                  | 0.71                  |
| Vertical C/D Ratio     | 0.81                  | 0.72                  |
| Cup Volume             | 0.556 mm <sup>3</sup> | 0.199 mm <sup>3</sup> |

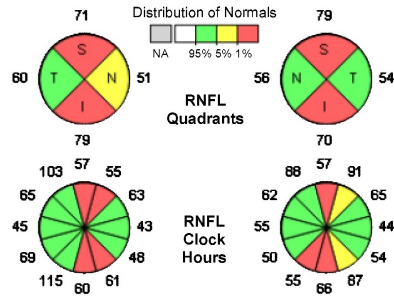

9/10 Signal Strength 8/10

# 2012

|                        | OD                    | OS                    |
|------------------------|-----------------------|-----------------------|
| Average RNFL Thickness | 64 $\mu$ m            | 67 $\mu$ m            |
| RNFL Symmetry          | 52%                   |                       |
| Rim Area               | 0.60 mm <sup>2</sup>  | 0.68 mm <sup>2</sup>  |
| Disc Area              | 1.79 mm <sup>2</sup>  | 1.39 mm <sup>2</sup>  |
| Average C/D Ratio      | 0.83                  | 0.71                  |
| Vertical C/D Ratio     | 0.81                  | 0.72                  |
| Cup Volume             | 0.556 mm <sup>3</sup> | 0.199 mm <sup>3</sup> |

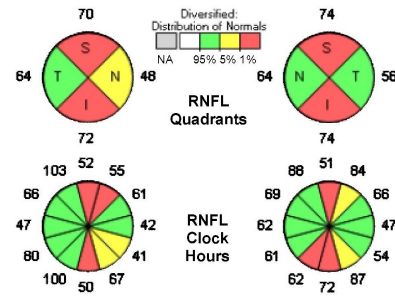

10/10 Signal Strength 9/10

# 2013

|                        | OD                    | OS                    |
|------------------------|-----------------------|-----------------------|
| Average RNFL Thickness | 62 $\mu$ m            | 69 $\mu$ m            |
| RNFL Symmetry          | 46%                   |                       |
| Rim Area               | 0.58 mm <sup>2</sup>  | 0.73 mm <sup>2</sup>  |
| Disc Area              | 1.76 mm <sup>2</sup>  | 1.50 mm <sup>2</sup>  |
| Average C/D Ratio      | 0.83                  | 0.70                  |
| Vertical C/D Ratio     | 0.81                  | 0.72                  |
| Cup Volume             | 0.544 mm <sup>3</sup> | 0.215 mm <sup>3</sup> |

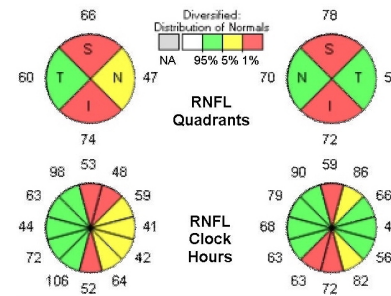

10/10 Signal Strength 7/10

# 2019

|                        | OD                    | OS                    |
|------------------------|-----------------------|-----------------------|
| Average RNFL Thickness | 61 $\mu$ m            | 63 $\mu$ m            |
| RNFL Symmetry          | 35%                   |                       |
| Rim Area               | 0.48 mm <sup>2</sup>  | 0.59 mm <sup>2</sup>  |
| Disc Area              | 1.79 mm <sup>2</sup>  | 1.34 mm <sup>2</sup>  |
| Average C/D Ratio      | 0.87                  | 0.74                  |
| Vertical C/D Ratio     | 0.87                  | 0.77                  |
| Cup Volume             | 0.665 mm <sup>3</sup> | 0.235 mm <sup>3</sup> |

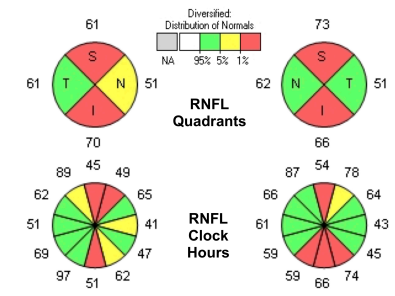

8/10 Signal Strength 8/10

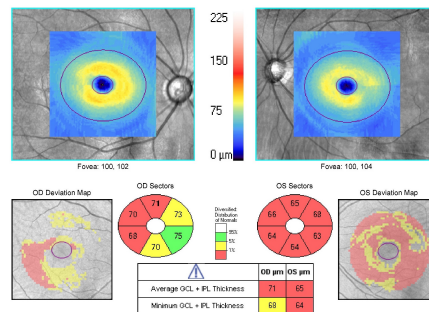

9/10 Signal Strength 9/10

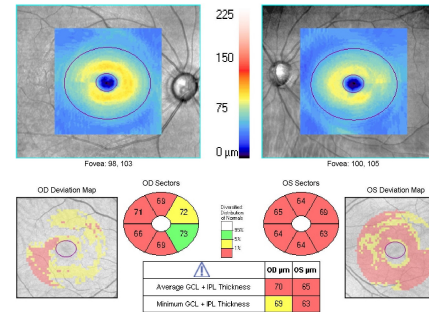

10/10 Signal Strength 9/10

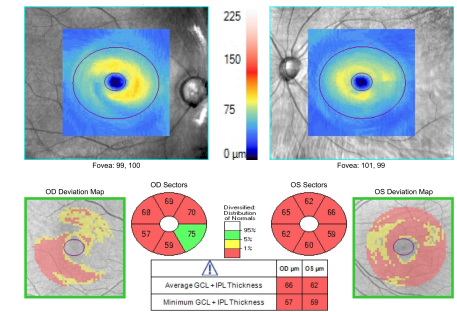

8/10 Signal Strength 8/10
