# Supplementary material
Source: PubMed Central journal article supplement (PMC7337276)

HVF 24-2

HVF 10-2

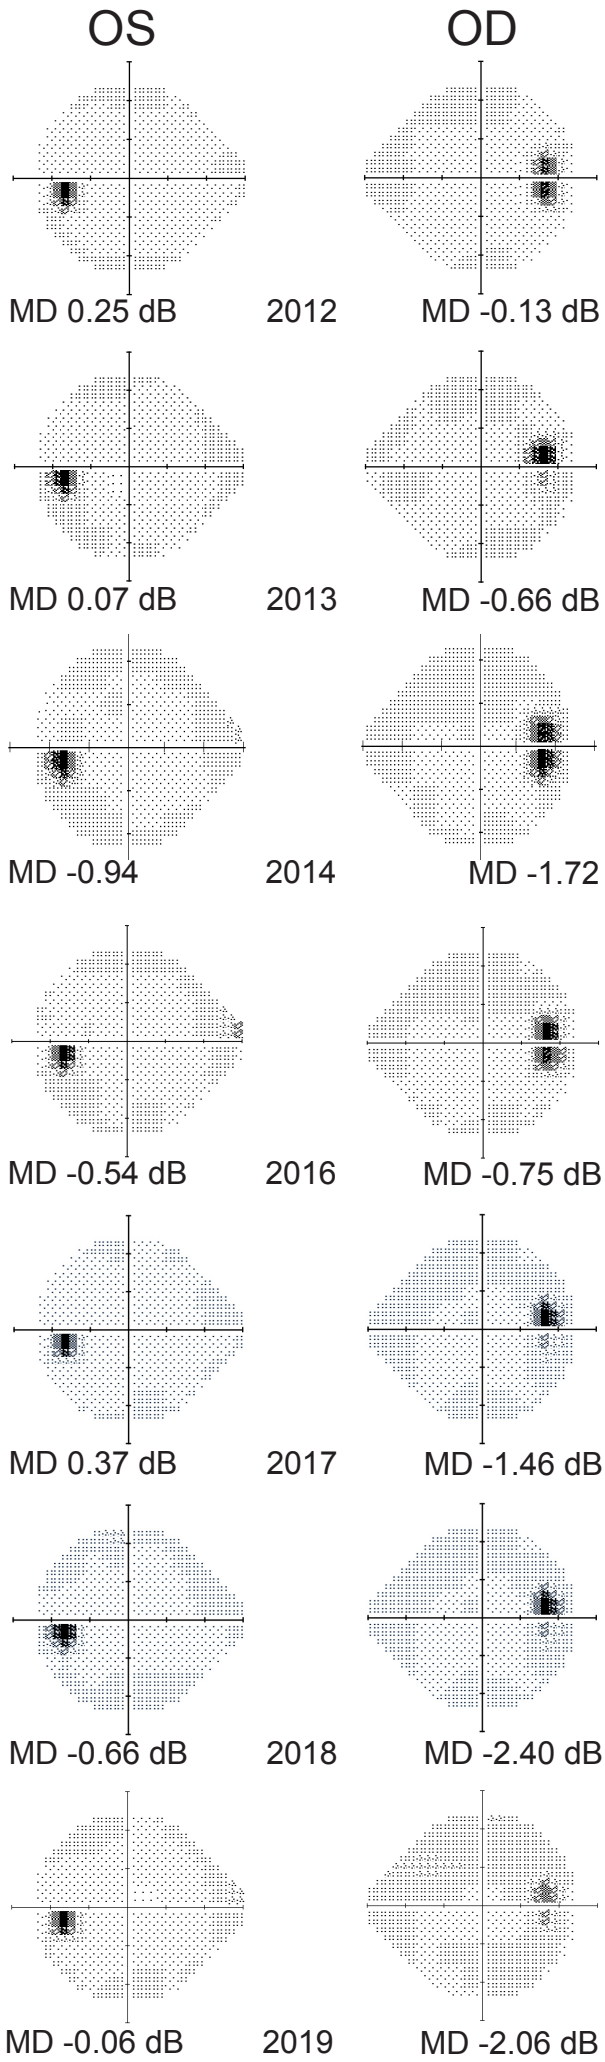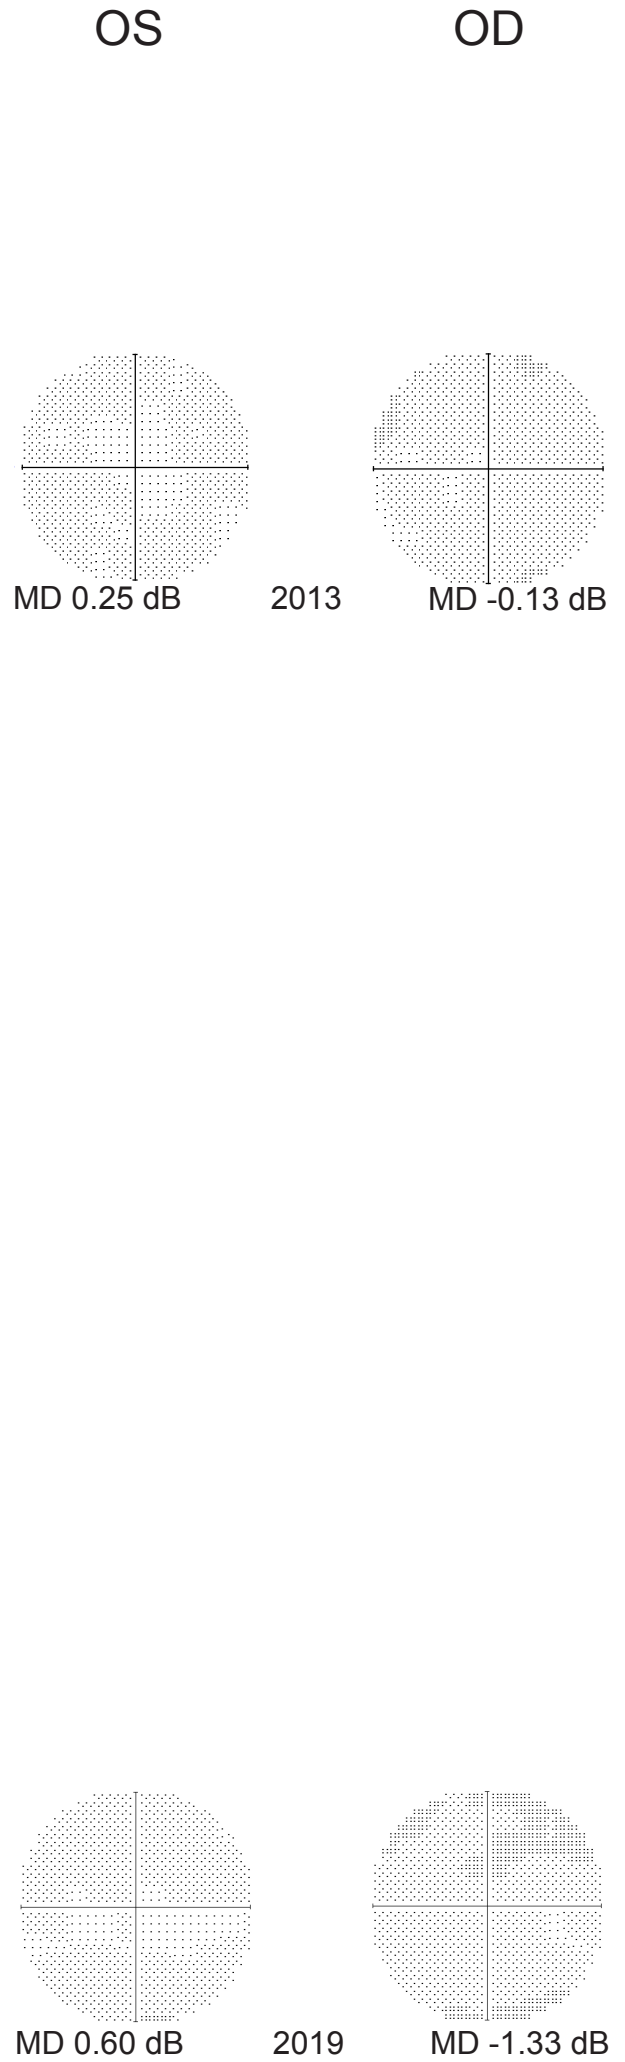

Supplement: NIHMS1544845-supplement-1.pdf [file NIHMS1544845-supplement-1.pdf]
